# Supplementary material
Source: bioRxiv or medRxiv preprint supplement (https://www.biorxiv.org/highwire/filestream/14824/field_highwire_adjunct_files/0/054072-1.pdf)

## Supplementary data

### Suppl. S1: List of primers used for the completion of genome and screening

| Description                                                             | Primer name                    | Primer sequence (5'→3')           |
|-------------------------------------------------------------------------|--------------------------------|-----------------------------------|
| Screening primers for human and bat RVAs                                | RVA-VP6_40F                    | GCK AGR GAC AAR ATT GTY GAA GG    |
|                                                                         | RVA-VP6_1083R                  | GWC CAA TTC ATR CCT GGT GGA       |
| Primers for completing segments of RVA/Bat-wt/CMR/BatLy03/2014/G25P[43] | RVA59_VP1_301-322R             | TTA GCT AAT TTA CCC TCA ACG G     |
|                                                                         | RVA59_VP1_328-349F             | AAG CTA ACG TCA GAA TTA TTC GC    |
|                                                                         | RVA59_VP1_737-758R             | GCT ACT AAG ATT GAC ATT GGT G     |
|                                                                         | RVA59_VP1_2991-3013F           | GTC AAT AAA CTA TGG CTG TTA CC    |
|                                                                         | RVA59_VP1_3048-3072F           | ATT AAT TCG TAT ACC CTT CAA AGG T |
|                                                                         | RVA59_VP3_76-100F              | CAA TCT TAT GCT GAT ACT CAA ACG   |
|                                                                         | RVA59_VP3_787-809R             | TGT CAA ATT GTG AAA TAC GTC GC    |
|                                                                         | RVA59_VP3_1795-1818F           | CGT TAT CTG GTT ACA TAT TTA GAG   |
|                                                                         | RVA59_VP4_2063-2084F           | GAA CAG ATG GTA GAT TTT TCG C     |
|                                                                         | RVA59_VP4_171-195R             | TAC AGT TGT TGA ATC GTT AAT TTC C |
| Primers for completing segments of RVA/Bat-wt/CMR/BatLi10/2014/G30P[42] | RVA46_VP4_118-137_F            | TTA CGC ACC AGT GAA TTG GG        |
|                                                                         | RVA46_VP4_839-860_R            | ACC ACT TAT ATC CTA AAC CAC C     |
|                                                                         | RVA46_VP7_172-191_F            | TCA ATG GAC GTT GTG TTG GC        |
|                                                                         | RVA46_VP7_803-823_R            | GAT TTG TTG TTG GAT CTG ACG       |
| Primers for the amplification of 5'and 3' ends of VP7 and VP4 segments  | RVA63_VP7-5'-227_R             | TTA CTAGAC TCA TGT CCA TCG        |
|                                                                         | RVA63_VP7-3'-839_F             | AGT ATT ACA AGT TGG AGG TGC       |
|                                                                         | RVA894_VP7-5'-202_R            | TGT AAC CGG TAT GTT CAA TCC       |
|                                                                         | RVA894_VP7-3'-788_F            | GTA AGA AAA TCG GAC CTA GAG       |
|                                                                         | RVA59_VP7-5'-213_R             | TCC ATT GAT CCA GTA ATT GGC       |
|                                                                         | RVA59_VP7-3'-843_F             | TAT AAC AGC AGA TCC AAC GAC       |
|                                                                         | RVA63_VP4-5'-230_R             | ATA CCC AAT TAT CGA CTG CTG       |
|                                                                         | RVA63_VP4-3'-2143_F            | CTT GTA ACT GAT TCA CCA GTC       |
|                                                                         | RVA59_VP4-5'-214_R             | AAA TTC TGT TGG CTG ATA GGG       |
|                                                                         | RVA59_VP4-3'-2100_F            | AGA TTT TTC GCA TAT AAA GTG AGC   |
| RVA894_VP4-5'-158_R                                                     | TAC TGT TGA GTC ATT TAC TTC CC |                                   |
| RVA894_VP4-3'-2072_F                                                    | GAA CAG ATG GTA GAT TTT TCG C  |                                   |

**Suppl. S2:** Nucleotide percentage similarity between primers and corresponding sequences of Cameroonian bat RVA strains. -: 5' or 3'-end amplification failed.

| Name of primer                                       | BatLy03 G25P[43] | BatLi08 G31P[42] | BatLi09 G30P[42] | BatLy17 G30P[xx] | BatLi10 G30P[42] | Reference (PMCID) |
|------------------------------------------------------|------------------|------------------|------------------|------------------|------------------|-------------------|
| <b>Outer capsid glycoprotein VP7 forward primers</b> |                  |                  |                  |                  |                  |                   |
| Beg9                                                 | 96.4             | 57.1             | -                | 85.7             | -                | 269590            |
| sBeg9                                                | 100              | 57.1             | -                | 90.5             | -                | 269590            |
| 9Con1-L                                              | 100              | 100              | -                | 100              | -                | 263808            |
| <b>Outer capsid glycoprotein VP7 reverse primer</b>  |                  |                  |                  |                  |                  |                   |
| EndA                                                 | 78.2             | 91.3             | 95.7             | -                | -                | 10364621          |
| VP7-Rdeg                                             | 95.0             | 95.0             | 100              | -                | -                | 114861            |
| End9                                                 | 85.1             | 66.7             | 59.3             | -                | -                | 269590            |
| RVG9                                                 | 89.5             | 63.2             | 63.2             | -                | -                | 269590            |
|                                                      |                  |                  |                  |                  |                  |                   |
| <b>Outer capsid protein VP4 forward primers</b>      |                  |                  |                  |                  |                  |                   |
| VP4-1-17F                                            | 88.8             | 88.8             | 77.8             | 94.4             | -                | 3295124           |
| Con3                                                 | 72.7             | 68.2             | 72.7             | 63.6             | 72.7             | 265294            |
| <b>Outer capsid protein VP4 reverse primer</b>       |                  |                  |                  |                  |                  |                   |
| Con2                                                 | 85.7             | 81.0             | 81.0             | 76.2             | 81.0             | 265294            |

**Suppl. S3:** Detail explanations of the comparisons between screening primer pairs and the novel bat VP4 and VP7 genotypes

VP7 forward primers Beg9, sBeg9 and 9Con1-L showed a (near) perfect match with BatLy03-G25, whereas strain BatLi08-G31 and BatLy17-G30 (first 6 nt are missing for this strain), showed up to 10 and 4 nucleotide mismatches at the 3' end of the primers, respectively. VP7 forward primer 9con1-L showed a perfect match with all the genotypes (G25, G30 and G31). Considering the VP7 reverse primers EndA, VP7-Rdeg, End9 and RVG9, BatLy03-G25 did not show a perfect match as there were 4, 1, 4 and 2 mutations, respectively. The mismatches with EndA, VP7-Rdeg and RVG9 were near the middle or at the 5' end of the primer, whereas 2 of those of End9 were close to the 3' end. Comparing the same VP7 reverse primers with strain BatLi08-G31 and BatLi09-G30 also showed mismatches. For EndA and VP7-Rdeg maximum 2 mismatches are located in the middle or near the 5'-end, whereas for End9 and RVG, there

were multiple mismatches of which 2 and 7 mismatches, respectively were right at the 3'-end. For VP4 forward primer VP4-1-17F, BatLy03-P[43], BatLi08-P[42], BatLy17-P[xx] and BatLi09-P[42] showed 2, 2, 1 and 2, mismatches, respectively, with at least a mutation at the first position from the 3' end for all of them. For con3, there were 6, 7, 6 and 8 mismatches with BatLy03-P[43], BatLi08-P[42], BatLi09-P[42] and BatLy17-P[xx], respectively. Considering the VP4 reverse primer con2, strains BatLy03-P[43], BatLi08-P[42], BatLi09-P[42], BatLy17-P[xx] and BatLi10-P[42] showed 3-5 mismatches including one at the second position from the 3'-end.

**Suppl. S4:** Phylogenetic trees of nucleotide sequences of the RVA VP6 sequence. HRVA: Human RVA VP6 sequence from patients exposed to bats; open triangle: Cameroonian bat RVA strains; Other bat RVA: KE4582, MSLH14 and MYAS33. Bootstrap values (1000 replicates) above 70% are shown. Scale represent number of nucleotide substations per site.

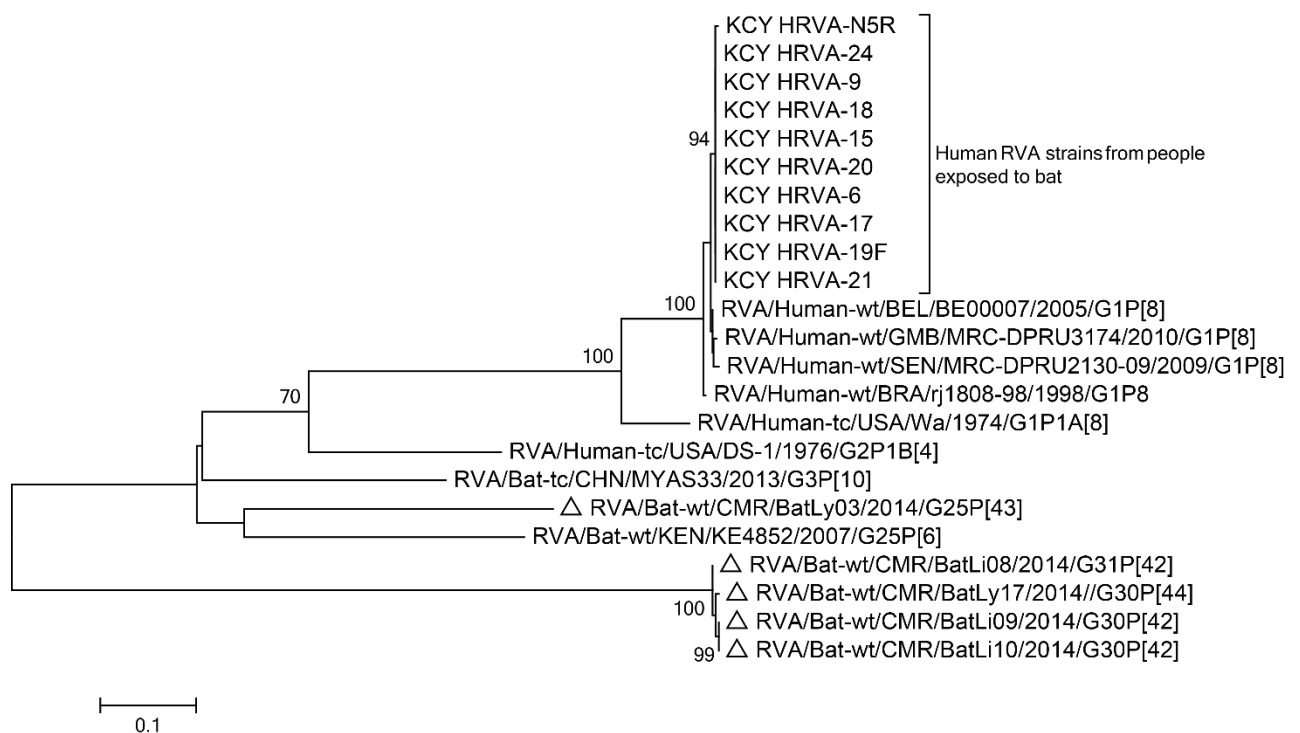

Supplement: Supplementary file [file 054072-1.pdf]
